# Supplementary material for: COX5A Alleviates Doxorubicin-Induced Cardiotoxicity by Suppressing Oxidative Stress, Mitochondrial Dysfunction and Cardiomyocyte Apoptosis
Source: MDPI journal article supplement (doi:10.3390/ijms241210400), 2023-06-20
Supplement: s1 [file s1]

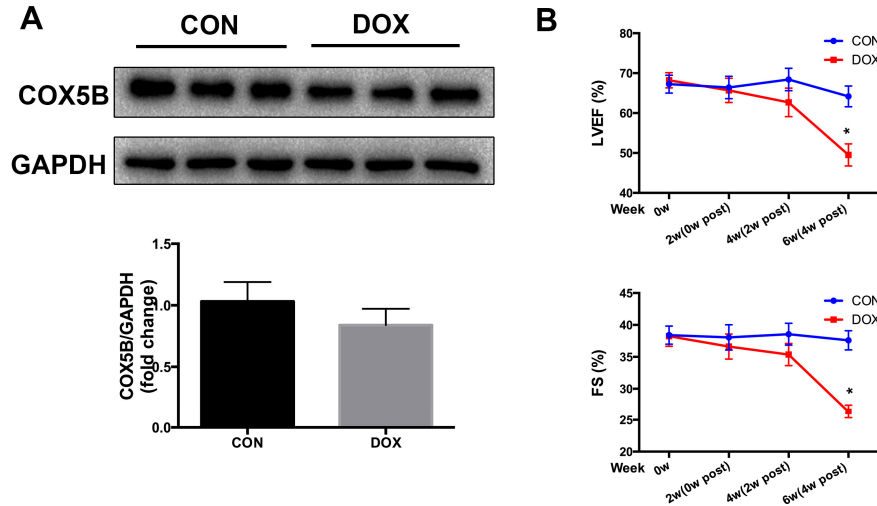

**Figure S1.** DOX-treatment on COX5B expression and cardiac function. **A.** Western blot analysis of COX5B expression in H9c2 cells treated with 0.5  $\mu$ M DOX for 24 h. **B.** The changes of cardiac functional parameters (LVEF and FS) at different time post DOX treatment. Data are expressed as mean  $\pm$  SEM. \* $P$  < 0.05 vs. the normal control (CON) group.

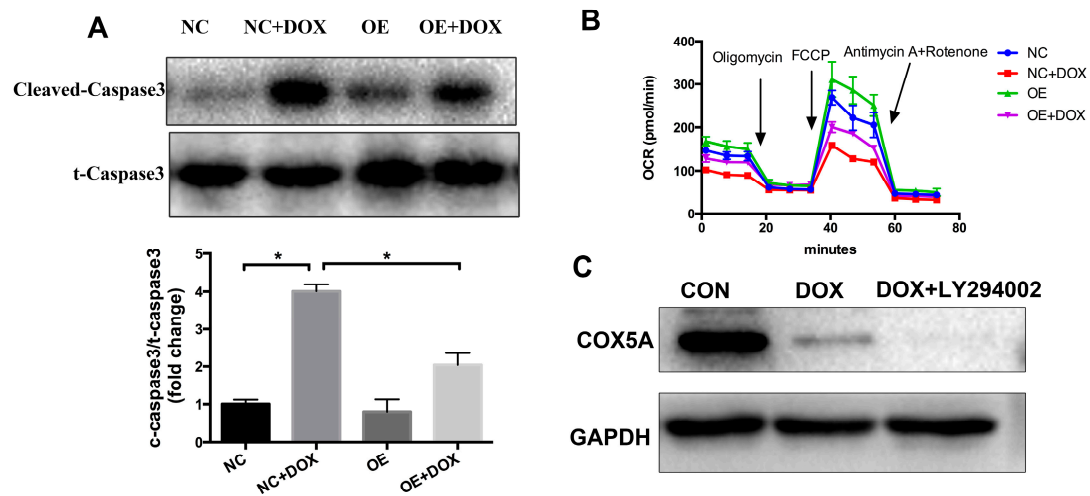

**Figure S2.** COX5A alleviates DOX-induced cardiomyocyte apoptosis and mitochondrial dysfunction *in vitro*. **A.** Western blot analysis of the protein level of cleaved caspase-3/t-caspase 3. **B.** OCR measurements by means of the Seahorse™ XFe96 extracellular flux analyzer at baseline and after addition of oligomycin, FCCP, and rotenone+antimycin A. **C.** LY294002 (10  $\mu$ M) was used to pre-treat H9c2 cells for 2 hours, followed by continued treatment with 0.5  $\mu$ M DOX for 24 hours. The expression of COX5A was detected using Western blot analysis. The results showed that treatment of DOX led to a significant decrease in the expression of COX5A, whereas combination treatment with DOX+LY294002 resulted in an even more substantial reduction of COX5A compared to DOX group alone. Data are expressed as mean  $\pm$  SEM. \* $P$  < 0.05.

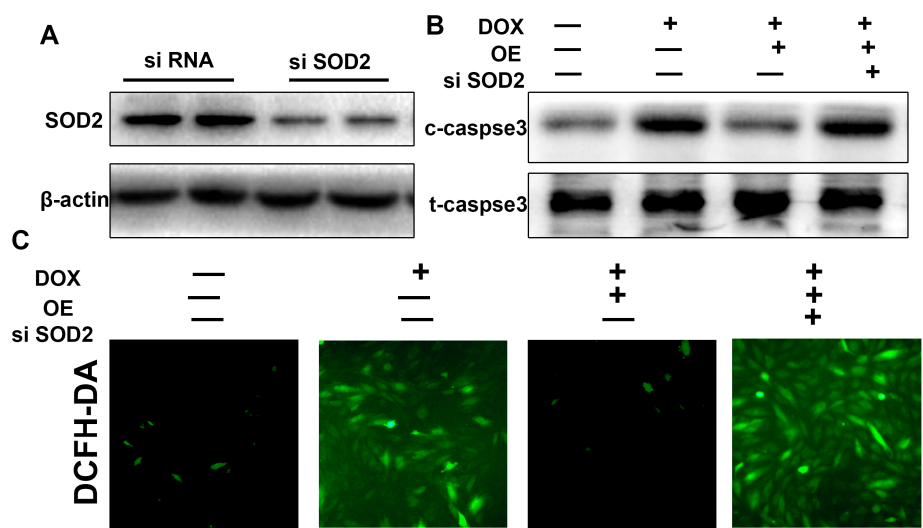

**Figure S3.** COX5A alleviates DOX-induced cardiomyocyte apoptosis and oxidative stress via upregulation of SOD2. **A.** Western blot analysis of the protein level of SOD2. **B.** Western blot analysis of the protein level of cleaved caspase-3 and t-caspase-3. **C.** DCFH-DA staining to detect ROS level.
